# Supplementary material
Source: Research Square preprint supplement (doi:10.21203/rs.3.rs-8941420/v1)
Supplement: Supplementary file 1 [file 04f8df01b60b99039184feff.xlsx]

## Sheet: Figure 4
Proportional Iodine Valve Testing Data - Figure 4
Pressure in mbar	Valve Position in %	Krypton flow rate in sccm
10	75	5.78
10	78	7.39
10	80	8.65
10	83	9.69
10	85	10.54
10	88	11.38
10	90	11.98
10	93	12.34
10	95	12.67
10	98	12.96
10	100	13.21
13	73	5.88
13	75	8.24
13	78	10.6
13	80	12.77
13	83	14.41
13	85	15.43
13	88	16.63
13	90	17.4
13	93	17.93
13	95	18.49
13	98	18.74
13	100	19.14
15	73	7.05
15	75	9.87
15	78	13.47
15	80	15.98
15	83	17.99
15	85	19.27
15	88	20.6
15	90	21.53
15	93	22.22
15	95	22.93
15	98	23.24
15	100	23.83
17	73	8.23
17	75	12.48
17	78	19.77
17	80	22.04
17	83	23.72
17	85	25.18
17	88	26.09
17	90	26.95
17	93	27.6
17	95	28
17	98	28.72
20	73	9.98
20	75	16.72
20	78	22.03
20	80	25.85
20	83	28.45
Fitted Data	Fitting function:	y = alpha(x) * p + beta(x)
Iodine tank temperature	10mbar (67.2°C)					13mbar (71.4°C)						15mbar (73.7°C)						17mbar (75.9°C)						20mbar (78.7°C)						25mbar (82.7°C)						30mbar (86.1°C)
p in mbar	x	alpha	beta	y		p in mbar	x	alpha	beta	y		p in mbar	x	alpha	beta	y		p in mbar	x	alpha	beta	y		p in mbar	x	alpha	beta	y		p in mbar	x	alpha	beta	y		p in mbar	x	alpha	beta	y
10	50	-38.0091	420.582	40.4912		13	50	-38.0091	420.582	-73.5361		15	50	-38.0091	420.582	-149.554		17	50	-38.0091	420.582	-225.573		20	50	-38.0091	420.582	-339.6		25	50	-38.0091	420.582	-529.645		30	50	-38.0091	420.582	-719.691
10	51	-34.2932	378.458	35.5264		13	51	-34.2932	378.458	-67.3531		15	51	-34.2932	378.458	-135.939		17	51	-34.2932	378.458	-204.526		20	51	-34.2932	378.458	-307.405		25	51	-34.2932	378.458	-478.871		30	51	-34.2932	378.458	-650.337
10	52	-30.8413	339.447	31.0337		13	52	-30.8413	339.447	-61.4903		15	52	-30.8413	339.447	-123.173		17	52	-30.8413	339.447	-184.856		20	52	-30.8413	339.447	-277.38		25	52	-30.8413	339.447	-431.586		30	52	-30.8413	339.447	-585.793
10	53	-27.6408	303.394	26.9861		13	53	-27.6408	303.394	-55.9363		15	53	-27.6408	303.394	-111.218		17	53	-27.6408	303.394	-166.5		20	53	-27.6408	303.394	-249.422		25	53	-27.6408	303.394	-387.626		30	53	-27.6408	303.394	-525.83
10	54	-24.6792	270.149	23.3574		13	54	-24.6792	270.149	-50.6801		15	54	-24.6792	270.149	-100.038		17	54	-24.6792	270.149	-149.397		20	54	-24.6792	270.149	-223.434		25	54	-24.6792	270.149	-346.83		30	54	-24.6792	270.149	-470.226
10	55	-21.9442	239.564	20.122		13	55	-21.9442	239.564	-45.7107		15	55	-21.9442	239.564	-89.5992		17	55	-21.9442	239.564	-133.488		20	55	-21.9442	239.564	-199.32		25	55	-21.9442	239.564	-309.042		30	55	-21.9442	239.564	-418.763
10	56	-19.4242	211.498	17.2553		13	56	-19.4242	211.498	-41.0174		15	56	-19.4242	211.498	-79.8658		17	56	-19.4242	211.498	-118.714		20	56	-19.4242	211.498	-176.987		25	56	-19.4242	211.498	-274.108		30	56	-19.4242	211.498	-371.229
10	57	-17.1076	185.809	14.7332		13	57	-17.1076	185.809	-36.5896		15	57	-17.1076	185.809	-70.8048		17	57	-17.1076	185.809	-105.02		20	57	-17.1076	185.809	-156.343		25	57	-17.1076	185.809	-241.881		30	57	-17.1076	185.809	-327.419
10	58	-14.9832	162.364	12.5325		13	58	-14.9832	162.364	-32.417		15	58	-14.9832	162.364	-62.3833		17	58	-14.9832	162.364	-92.3496		20	58	-14.9832	162.364	-137.299		25	58	-14.9832	162.364	-212.215		30	58	-14.9832	162.364	-287.131
10	59	-13.04	141.031	10.6306		13	59	-13.04	141.031	-28.4895		15	59	-13.04	141.031	-54.5695		17	59	-13.04	141.031	-80.6496		20	59	-13.04	141.031	-119.77		25	59	-13.04	141.031	-184.97		30	59	-13.04	141.031	-250.17
10	60	-11.2676	121.682	9.00572		13	60	-11.2676	121.682	-24.7971		15	60	-11.2676	121.682	-47.3323		17	60	-11.2676	121.682	-69.8676		20	60	-11.2676	121.682	-103.67		25	60	-11.2676	121.682	-160.008		30	60	-11.2676	121.682	-216.347
10	61	-9.65568	104.194	7.6369		13	61	-9.65568	104.194	-21.3301		15	61	-9.65568	104.194	-40.6415		17	61	-9.65568	104.194	-59.9529		20	61	-9.65568	104.194	-88.9199		25	61	-9.65568	104.194	-137.198		30	61	-9.65568	104.194	-185.477
10	62	-8.19429	88.4467	6.50382		13	62	-8.19429	88.4467	-18.079		15	62	-8.19429	88.4467	-34.4676		17	62	-8.19429	88.4467	-50.8562		20	62	-8.19429	88.4467	-75.439		25	62	-8.19429	88.4467	-116.41		30	62	-8.19429	88.4467	-157.382
10	63	-6.87379	74.3248	5.58692		13	63	-6.87379	74.3248	-15.0345		15	63	-6.87379	74.3248	-28.782		17	63	-6.87379	74.3248	-42.5296		20	63	-6.87379	74.3248	-63.151		25	63	-6.87379	74.3248	-97.5199		30	63	-6.87379	74.3248	-131.889
10	64	-5.68488	61.7162	4.86738		13	64	-5.68488	61.7162	-12.1873		15	64	-5.68488	61.7162	-23.557		17	64	-5.68488	61.7162	-34.9268		20	64	-5.68488	61.7162	-51.9814		25	64	-5.68488	61.7162	-80.4058		30	64	-5.68488	61.7162	-108.83
10	65	-4.61855	50.5126	4.32715		13	65	-4.61855	50.5126	-9.5285		15	65	-4.61855	50.5126	-18.7656		17	65	-4.61855	50.5126	-28.0027		20	65	-4.61855	50.5126	-41.8583		25	65	-4.61855	50.5126	-64.9511		30	65	-4.61855	50.5126	-88.0438
10	66	-3.66611	40.6101	3.9489		13	66	-3.66611	40.6101	-7.04944		15	66	-3.66611	40.6101	-14.3817		17	66	-3.66611	40.6101	-21.7139		20	66	-3.66611	40.6101	-32.7122		25	66	-3.66611	40.6101	-51.0428		30	66	-3.66611	40.6101	-69.3734
10	67	-2.8192	31.9081	3.71606		13	67	-2.8192	31.9081	-4.74154		15	67	-2.8192	31.9081	-10.3799		17	67	-2.8192	31.9081	-16.0183		20	67	-2.8192	31.9081	-24.4759		25	67	-2.8192	31.9081	-38.5719		30	67	-2.8192	31.9081	-52.6679
10	68	-2.06974	24.3102	3.61278		13	68	-2.06974	24.3102	-2.59645		15	68	-2.06974	24.3102	-6.73594		17	68	-2.06974	24.3102	-10.8754		20	68	-2.06974	24.3102	-17.0847		25	68	-2.06974	24.3102	-27.4334		30	68	-2.06974	24.3102	-37.7821
10	69	-1.41	17.7239	3.62396		13	69	-1.41	17.7239	-0.606035		15	69	-1.41	17.7239	-3.42603		17	69	-1.41	17.7239	-6.24603		20	69	-1.41	17.7239	-10.476		25	69	-1.41	17.7239	-17.526		30	69	-1.41	17.7239	-24.576
10	70	-0.832532	12.0606	3.73526		13	70	-0.832532	12.0606	1.23766		15	70	-0.832532	12.0606	-0.4274		17	70	-0.832532	12.0606	-2.09246		20	70	-0.832532	12.0606	-4.59006		25	70	-0.832532	12.0606	-8.75272		30	70	-0.832532	12.0606	-12.9154
10	71	-0.330225	7.23531	3.93306		13	71	-0.330225	7.23531	2.94239		15	71	-0.330225	7.23531	2.28194		17	71	-0.330225	7.23531	1.62149		20	71	-0.330225	7.23531	0.630819		25	71	-0.330225	7.23531	-1.0203		30	71	-0.330225	7.23531	-2.67143
10	72	0.103729	3.16721	4.20451		13	72	0.103729	3.16721	4.51569		15	72	0.103729	3.16721	4.72315		17	72	0.103729	3.16721	4.93061		20	72	0.103729	3.16721	5.2418		25	72	0.103729	3.16721	5.76045		30	72	0.103729	3.16721	6.27909
10	73	0.475821	-0.220752	4.53746		13	73	0.475821	-0.220752	5.96492		15	73	0.475821	-0.220752	6.91657		17	73	0.475821	-0.220752	7.86821		20	73	0.475821	-0.220752	9.29567		25	73	0.475821	-0.220752	11.6748		30	73	0.475821	-0.220752	14.0539
10	74	0.792229	-3.00175	4.92054		13	74	0.792229	-3.00175	7.29723		15	74	0.792229	-3.00175	8.88169		17	74	0.792229	-3.00175	10.4662		20	74	0.792229	-3.00175	12.8428		25	74	0.792229	-3.00175	16.804		30	74	0.792229	-3.00175	20.7651
10	75	1.05882	-5.24506	5.34312		13	75	1.05882	-5.24506	8.51957		15	75	1.05882	-5.24506	10.6372		17	75	1.05882	-5.24506	12.7548		20	75	1.05882	-5.24506	15.9313		25	75	1.05882	-5.24506	21.2254		30	75	1.05882	-5.24506	26.5195
10	76	1.28114	-7.01608	5.79529		13	76	1.28114	-7.01608	9.63869		15	76	1.28114	-7.01608	12.201		17	76	1.28114	-7.01608	14.7632		20	76	1.28114	-7.01608	18.6066		25	76	1.28114	-7.01608	25.0123		30	76	1.28114	-7.01608	31.418
10	77	1.46442	-8.37632	6.26789		13	77	1.46442	-8.37632	10.6612		15	77	1.46442	-8.37632	13.59		17	77	1.46442	-8.37632	16.5188		20	77	1.46442	-8.37632	20.9121		25	77	1.46442	-8.37632	28.2342		30	77	1.46442	-8.37632	35.5563
10	78	1.6136	-9.38344	6.75252		13	78	1.6136	-9.38344	11.5933		15	78	1.6136	-9.38344	14.8205		17	78	1.6136	-9.38344	18.0477		20	78	1.6136	-9.38344	22.8885		25	78	1.6136	-9.38344	30.9565		30	78	1.6136	-9.38344	39.0244
10	79	1.73327	-10.0912	7.24151		13	79	1.73327	-10.0912	12.4413		15	79	1.73327	-10.0912	15.9078		17	79	1.73327	-10.0912	19.3744		20	79	1.73327	-10.0912	24.5742		25	79	1.73327	-10.0912	33.2405		30	79	1.73327	-10.0912	41.9069
10	80	1.82773	-10.5494	7.72793		13	80	1.82773	-10.5494	13.2111		15	80	1.82773	-10.5494	16.8666		17	80	1.82773	-10.5494	20.5221		20	80	1.82773	-10.5494	26.0053		25	80	1.82773	-10.5494	35.1439		30	80	1.82773	-10.5494	44.2826
10	81	1.90097	-10.8041	8.20559		13	81	1.90097	-10.8041	13.9085		15	81	1.90097	-10.8041	17.7105		17	81	1.90097	-10.8041	21.5124		20	81	1.90097	-10.8041	27.2153		25	81	1.90097	-10.8041	36.7202		30	81	1.90097	-10.8041	46.225
10	82	1.95665	-10.8975	8.66906		13	82	1.95665	-10.8975	14.539		15	82	1.95665	-10.8975	18.4523		17	82	1.95665	-10.8975	22.3656		20	82	1.95665	-10.8975	28.2356		25	82	1.95665	-10.8975	38.0188		30	82	1.95665	-10.8975	47.8021
10	83	1.99813	-10.8676	9.11363		13	83	1.99813	-10.8676	15.108		15	83	1.99813	-10.8676	19.1043		17	83	1.99813	-10.8676	23.1005		20	83	1.99813	-10.8676	29.0949		25	83	1.99813	-10.8676	39.0855		30	83	1.99813	-10.8676	49.0762
10	84	2.02844	-10.749	9.53535		13	84	2.02844	-10.749	15.6207		15	84	2.02844	-10.749	19.6775		17	84	2.02844	-10.749	23.7344		20	84	2.02844	-10.749	29.8197		25	84	2.02844	-10.749	39.9619		30	84	2.02844	-10.749	50.1041
10	85	2.0503	-10.572	9.93101		13	85	2.0503	-10.572	16.0819		15	85	2.0503	-10.572	20.1825		17	85	2.0503	-10.572	24.2831		20	85	2.0503	-10.572	30.4341		25	85	2.0503	-10.572	40.6856		30	85	2.0503	-10.572	50.9371
10	86	2.06614	-10.3633	10.2981		13	86	2.06614	-10.3633	16.4966		15	86	2.06614	-10.3633	20.6289		17	86	2.06614	-10.3633	24.7611		20	86	2.06614	-10.3633	30.9596		25	86	2.06614	-10.3633	41.2903		30	86	2.06614	-10.3633	51.621
10	87	2.07805	-10.1456	10.635		13	87	2.07805	-10.1456	16.8691		15	87	2.07805	-10.1456	21.0253		17	87	2.07805	-10.1456	25.1814		20	87	2.07805	-10.1456	31.4155		25	87	2.07805	-10.1456	41.8058		30	87	2.07805	-10.1456	52.1961
10	88	2.08782	-9.93761	10.9406		13	88	2.08782	-9.93761	17.204		15	88	2.08782	-9.93761	21.3797		17	88	2.08782	-9.93761	25.5553		20	88	2.08782	-9.93761	31.8188		25	88	2.08782	-9.93761	42.2579		30	88	2.08782	-9.93761	52.697
10	89	2.09691	-9.75438	11.2147		13	89	2.09691	-9.75438	17.5054		15	89	2.09691	-9.75438	21.6992		17	89	2.09691	-9.75438	25.893		20	89	2.09691	-9.75438	32.1838		25	89	2.09691	-9.75438	42.6683		30	89	2.09691	-9.75438	53.1528
10	90	2.10648	-9.60696	11.4578		13	90	2.10648	-9.60696	17.7772		15	90	2.10648	-9.60696	21.9902		17	90	2.10648	-9.60696	26.2032		20	90	2.10648	-9.60696	32.5226		25	90	2.10648	-9.60696	43.055		30	90	2.10648	-9.60696	53.5874
10	91	2.11737	-9.50253	11.6712		13	91	2.11737	-9.50253	18.0233		15	91	2.11737	-9.50253	22.258		17	91	2.11737	-9.50253	26.4928		20	91	2.11737	-9.50253	32.8449		25	91	2.11737	-9.50253	43.4317		30	91	2.11737	-9.50253	54.0186
10	92	2.13012	-9.4444	11.8568		13	92	2.13012	-9.4444	18.2471		15	92	2.13012	-9.4444	22.5073		17	92	2.13012	-9.4444	26.7676		20	92	2.13012	-9.4444	33.1579		25	92	2.13012	-9.4444	43.8085		30	92	2.13012	-9.4444	54.4591
10	93	2.14493	-9.43199	12.0173		13	93	2.14493	-9.43199	18.4521		15	93	2.14493	-9.43199	22.742		17	93	2.14493	-9.43199	27.0318		20	93	2.14493	-9.43199	33.4666		25	93	2.14493	-9.43199	44.1913		30	93	2.14493	-9.43199	54.9159
10	94	2.16171	-9.46084	12.1563		13	94	2.16171	-9.46084	18.6414		15	94	2.16171	-9.46084	22.9649		17	94	2.16171	-9.46084	27.2883		20	94	2.16171	-9.46084	33.7734		25	94	2.16171	-9.46084	44.582		30	94	2.16171	-9.46084	55.3906
10	95	2.18005	-9.52261	12.2779		13	95	2.18005	-9.52261	18.8181		15	95	2.18005	-9.52261	23.1782		17	95	2.18005	-9.52261	27.5383		20	95	2.18005	-9.52261	34.0784		25	95	2.18005	-9.52261	44.9787		30	95	2.18005	-9.52261	55.879
10	96	2.19922	-9.60509	12.3871		13	96	2.19922	-9.60509	18.9848		15	96	2.19922	-9.60509	23.3832		17	96	2.19922	-9.60509	27.7817		20	96	2.19922	-9.60509	34.3793		25	96	2.19922	-9.60509	45.3755		30	96	2.19922	-9.60509	56.3716
10	97	2.21818	-9.69218	12.4896		13	97	2.21818	-9.69218	19.1442		15	97	2.21818	-9.69218	23.5805		17	97	2.21818	-9.69218	28.0169		20	97	2.21818	-9.69218	34.6714		25	97	2.21818	-9.69218	45.7623		30	97	2.21818	-9.69218	56.8533
10	98	2.23558	-9.76389	12.5919		13	98	2.23558	-9.76389	19.2986		15	98	2.23558	-9.76389	23.7697		17	98	2.23558	-9.76389	28.2409		20	98	2.23558	-9.76389	34.9476		25	98	2.23558	-9.76389	46.1255		30	98	2.23558	-9.76389	57.3034
10	99	2.24974	-9.79637	12.701		13	99	2.24974	-9.79637	19.4502		15	99	2.24974	-9.79637	23.9497		17	99	2.24974	-9.79637	28.4492		20	99	2.24974	-9.79637	35.1984		25	99	2.24974	-9.79637	46.4471		30	99	2.24974	-9.79637	57.6958
10	100	2.25869	-9.76187	12.825		13	100	2.25869	-9.76187	19.6011		15	100	2.25869	-9.76187	24.1185		17	100	2.25869	-9.76187	28.6358		20	100	2.25869	-9.76187	35.4119		25	100	2.25869	-9.76187	46.7053		30	100	2.25869	-9.76187	57.9988

## Sheet: Figure 5
Iodine Feeding Comparison - Figure 5
Iodine			Krypton
Flow control setting	Chamber Pressure		Flow control setting	Chamber Pressure
Mean	Mean	Std	Mean	Mean	Std
100	0.00196447	2.05877e-05	98.6	0.0001416	5.39882e-06
98.5075	0.00191345	1.36914e-05	97.1714	0.000120856	8.16405e-06
97.0149	0.00186207	2.05744e-05	95.7429	0.00010779	4.22262e-06
95.5224	0.00180275	1.7673e-05	94.3143	9.44966e-05	3.84326e-06
94.0299	0.00174582	1.71637e-05	92.8857	8.47439e-05	2.99548e-06
92.5373	0.00169561	1.30932e-05	91.4571	7.54755e-05	1.91619e-06
91.0448	0.0016478	1.53772e-05	90.0286	6.77671e-05	2.87749e-06
89.5522	0.00160022	1.78052e-05	88.6	6.13181e-05	1.9822e-06
88.0597	0.00155351	1.57327e-05	87.1714	5.48615e-05	1.53739e-06
86.5672	0.0015042	1.70801e-05	85.7429	4.92117e-05	1.64279e-06
85.0746	0.00145585	1.64889e-05	84.3143	4.47446e-05	1.12608e-06
83.5821	0.00140718	1.67626e-05	82.8857	4.07715e-05	1.34489e-06
82.0896	0.00135359	1.60172e-05	81.4571	3.72517e-05	8.89243e-07
80.597	0.0013058	1.75123e-05	80.0286	3.39783e-05	1.01203e-06
79.1045	0.00125248	1.75025e-05	78.6	3.14817e-05	7.09449e-07
77.6119	0.00119976	1.80519e-05	77.1714	2.91975e-05	6.36848e-07
76.1194	0.0011434	1.75182e-05	75.7429	2.72671e-05	6.02355e-07
74.6269	0.00108918	1.77752e-05	74.3143	2.5545e-05	4.34351e-07
73.1343	0.00102605	2.02198e-05	72.8857	2.40454e-05	4.71958e-07
71.6418	0.000965833	1.93869e-05	71.4571	2.26868e-05	3.25502e-07
70.1493	0.000901822	2.18646e-05	70.0286	2.14249e-05	3.26657e-07
68.6567	0.000844488	2.19945e-05	68.6	2.03714e-05	2.83026e-07
67.1642	0.00077217	2.02621e-05	67.1714	1.94108e-05	2.5769e-07
65.6716	0.000705623	1.83471e-05	65.7429	1.85772e-05	2.4146e-07
64.1791	0.00063703	2.6491e-05	64.3143	1.78398e-05	1.97701e-07
62.6866	0.000565868	2.20499e-05	62.8857	1.71836e-05	1.84078e-07
61.194	0.000491114	2.3882e-05	61.4571	1.65956e-05	1.69802e-07
59.7015	0.000425644	2.19033e-05	60.0286	1.6054e-05	1.4675e-07
58.209	0.000352856	2.04387e-05	58.6	1.55756e-05	1.34409e-07
56.7164	0.000289092	1.7342e-05	57.1714	1.51422e-05	1.20002e-07
55.2239	0.000230566	1.56577e-05	55.7429	1.47495e-05	1.11356e-07
53.7313	0.000176274	1.4824e-05	54.3143	1.43802e-05	1.03255e-07
52.2388	0.000130906	1.24737e-05	52.8857	1.40291e-05	9.57901e-08
50.7463	0.000100901	7.71183e-06	51.4571	1.37118e-05	9.0566e-08
49.2537	7.99155e-05	5.21787e-06	50.0286	1.34125e-05	8.34678e-08
47.7612	6.43962e-05	4.05442e-06	48.6	1.31325e-05	8.36142e-08
46.2687	5.1926e-05	3.25058e-06	47.1714	1.28673e-05	7.37641e-08
44.7761	4.26783e-05	2.35575e-06	45.7429	1.2613e-05	7.2809e-08
43.2836	3.55566e-05	1.89924e-06	44.3143	1.23763e-05	6.76253e-08
41.791	3.02965e-05	1.32395e-06	42.8857	1.21498e-05	6.35317e-08
40.2985	2.63707e-05	1.00478e-06	41.4571	1.19361e-05	6.2028e-08
38.806	2.33387e-05	7.90754e-07	40.0286	1.17307e-05	5.96557e-08
37.3134	2.08762e-05	6.08397e-07	38.6	1.15319e-05	5.7328e-08
35.8209	1.89771e-05	4.8641e-07	37.1714	1.13421e-05	5.43175e-08
34.3284	1.7499e-05	3.80118e-07	35.7429	1.11655e-05	5.16872e-08
32.8358	1.63141e-05	3.13633e-07	34.3143	1.09919e-05	4.93144e-08
31.3433	1.53502e-05	2.51178e-07	32.8857	1.08301e-05	4.69482e-08
29.8507	1.45574e-05	2.13738e-07	31.4571	1.067e-05	4.46548e-08
28.3582	1.3864e-05	1.84176e-07	30.0286	1.05233e-05	4.29889e-08
26.8657	1.32669e-05	1.6327e-07	28.6	1.03774e-05	4.32235e-08
25.3731	1.27351e-05	1.47016e-07	27.1714	1.02364e-05	3.80792e-08
23.8806	1.22586e-05	1.31027e-07	25.7429	1.01041e-05	3.84126e-08
22.3881	1.18292e-05	1.19474e-07	24.3143	9.97409e-06	3.79848e-08
20.8955	1.14333e-05	1.10184e-07	22.8857	9.85207e-06	3.38392e-08
19.403	1.10753e-05	1.00564e-07	21.4571	9.73392e-06	3.45224e-08
17.9104	1.07469e-05	9.243e-08	20.0286	9.61363e-06	3.36777e-08
16.4179	1.04475e-05	8.49807e-08	18.6	9.50336e-06	3.09292e-08
14.9254	1.01677e-05	7.64004e-08	17.1714	9.39545e-06	3.13982e-08
13.4328	9.91051e-06	7.07793e-08	15.7429	9.29089e-06	3.13411e-08
11.9403	9.67144e-06	6.93256e-08	14.3143	9.18665e-06	2.92964e-08
10.4478	9.44728e-06	6.24335e-08	12.8857	9.09048e-06	2.79037e-08
8.95522	9.2367e-06	6.03927e-08	11.4571	8.99347e-06	2.83606e-08
7.46269	9.04005e-06	5.62655e-08	10.0286	8.89891e-06	2.61535e-08
5.97015	8.8505e-06	5.41289e-08	8.6	8.80577e-06	2.84768e-08
4.47761	8.67344e-06	4.76431e-08	7.17143	8.71619e-06	2.44847e-08
2.98507	8.51117e-06	4.73556e-08	5.74286	8.63409e-06	2.35091e-08
1.49254	8.34832e-06	4.66079e-08	4.31429	8.55326e-06	2.45498e-08
			2.88571	8.47231e-06	2.38102e-08
			1.45714	8.39038e-06	2.33053e-08
			0.0285714	8.30944e-06	2.24383e-08

## Sheet: Figure 7
Planar iodine cathode testing data - Figure 7
Hand recorded data. For the automatically recorded data contact the author please.
time	Krypton flow in sccm	U_keeper	I_keeper	U_anode in V	I_anode in mA	p_chamber	Mount temp	Iodine valve current	comment
		in V	in mA			in mbar	in °C	in A
1339	0	0	0	0	0	1.52e-06	98.6	0	valve block: 130°C, Larger ignition coil is connected to anode, Iodine tank is heated to 95°C.
1342	0	500	1200	500	3000	0.001		0.13	trying ignition with iodine only
1344	30	500	1200	500	3000	7e-05	99	0	Not successful, trying krypton instead
1345	0	14.8	1200	33.8	3000	0.0014	100	0.13	Instant ignition, as well as switching to iodine.
1346	0	15.7	1200	33	3000	0.00133	103	0.13	Values look stable, but plume is flickering (plume mode)
1347	0	22.4	1200	53	3000	0.00065	112	0.129	Plasma is green if flowrate is too low
1349	30	19.6	1200	46	3000	0.001	147	0	Krypton only, not stable anymore
1352	0	122	1200	130	3000	0.0014	155	0.2	Iodine only, green plasma
1358	0	46	1200	0	0	0.001	153	0.13	Keeper only, switches between states
1402	30	17	1200	41	3000	0.00056	162	0	Only stable at very high pressures, goes off after a few seconds.
1405	0	133	1200	120	3000	0.0013	158	0.2	Unstable.
1407									end of test

## Sheet: Figure 8
Hollow cathode testing data - Figure 8
Hand recorded data. For the automatically recorded data contact the author please.
time	Krypton flow in sccm	U_keeper	I_keeper	U_anode	I_anode	p_chamber	Mount temp	comment
	in sccm	in V	in mA	in V	in mA	in mbar	in °C
945	0	0	0	0	0	1.3e-06		Valve block: 130°C, Larger ignition coil is connected to anode.
950	30	500	1200	500	3000	1.5e-06		Direct ignition, goes off again. No longterm stable discharge.
948		20.1	1200	53	3000			Very unstable, 800 mA to keeper while off
952	30	15.4	1200	29.2	3000	0.00076	224	Unstable, spot mode
953	30	15.7	1200	29.8	3000	0.00076	223	Suddenly stabilises
955	30	15.8	1200	30.7	3000	0.000764	210	M0, 40mA, 390kHz
		15.9	1100	32.2
		18.2	1000	33.9
		16.2	900	32.2			180
		14.8	800	32.2
		14.7	700	33.8				getting unstable
		15.1	600	32.8
		14.4	500	34
		12.7	400	31.7
			300
1005	30	15.9	1200	39	3000	0.00076	168	stable again, spot mode
	29	14.7		35.7			171
	28	14.8		37.1			166
	27	15.1		38.5			161
	26	15.2		40.7			157
	25	15.1		41.8			153
1010	25	15.2	1200	42.1	3000	0.000648	155
		15	1100	42.6			153
		14.8	1000	43.4			153
		14.7	900	45			152
		14.5	800	46			153
		14.3	700	46.8			152
		14.2	600	47.3			151
		13.8	500	47.9			152
1015	25	13.9	500	47.4	3000	0.00065	151	Very strong, low frequency amplitude, see data
		13.8		46.5	2900
		14		46	2800
		14.2		45	2700
		13.1		45.8	2600			plume mode, M2
		12.9		35.3	2500
		14		30.7	2400
		15.1		31.2	2300
		14.1		50.5	2200
1023	25	14.6	1000	41.4	2500	0.00065	134
1105	25	16.2	1200	42.1	2000	0.00065	140

## Sheet: Figure 9
Hollow cathode testing data - Figure 9
Hand recorded data. For the automatically recorded data contact the author please.
time	Krypton flow in sccm	U_keeper	I_keeper	U_anode	I_anode	p_chamber	Mount temp	iodine valve current	tank temperature	comment
	in sccm	in V	in mA	in V	in mA	in mbar	in °C	in mA
1318	0	100	68	0	0	2.7e-06	125	0	90	valve heated to 130°C, Keeper Short circuit
1320	30	19.2	1200	53	2000	0.0008	146	0	90	Somehow unstable, but ignites easily
1327	30	15.3	1200	52	3000	0.0008	226	0	90	Still keeper short cicuit
1330	0					0.0001		0.2	90	Switching to iodine, pressure was too low
1329	30	15	1200	43	3000	0.00081	237	0	90	Back to krypton, plume mode
1333	30	14.3	1200	41	3000	0.000814	237	0	109	Heating tank to 110°C
1339	30	14.2	1200	40.5	3000	0.000816	236	0	110	Stabilised in operation, 144 mbar
1340	0		1200		3000	0.0002		0.2	110	Switching to iodine, failed, pressure too low
1343	30	13.6	1200	44	3000	0.000822	263	0		Switching to krypton
1345	30	13.4	1200	44	3000	0.00082	259	0	130
1348	30		1200		3000	0.000819				Operation on kr + I, then slowly reducing kr
1349	0	16.7	1200	53	3000	0.000319	248	0.2	130
1352	0	14.6	1200	45	3000	0.000545	251	0.2	130.5
1357	0	15.3	1200	52	3000	0.00069	246	0.143	130	0.8A, 8.1kHz
1359	0	16.6	1200	49.6	3000	0.00048	147	0.129	130	Reduction of flow improves performance, 0.4A, 13kHz
1404	0	16.4	1200	49	3000	0.000565	249	0.129	130	0.5A, 13.7kHz
1408	0	16.6	1200	50	3000	0.00056	250	0.128	130
1411	0	16.8	1200	50.8	3000	0.000575	250.7	0.13	130	M3, 0.8A, 9kHz
1413	0	16.1	1200	51	3000	0.00058	251	0.131	130	M4, 0.7A, 7.4kHz
1432	0	17.1	1200	50.1	3000	0.00053	256	0.131	130	M5, 1A, 15kHz
1437	0	16.6	1200	49.1	3000	0.000556	257	0.131	130	M6, M7, 1.6A, 11kHz
1442	0	13.6	100	49.5	3000	0.00061	256	0.131	130	Turned keeper down, M8, 1.9A
1445	0	14.2	100	50.1	2900	0.00063	252	0.131	130	M9, 2A
1446	0	14	100	49.5	2800	0.000642	249	0.131	130	M10, 2.3A
1447	0	14.1	100	47.5	2700	0.000647	247			goes off
1449	0	15.1	1200	55	3000	0.00076	246	0.131	130	instant reignition, M11, 3.3A
1450	0	13.7	1200	54.5	2900	0.000766	241	0.131	130	M12, 3A
1451	0	13.5	1200	55	2800	0.000774	241.4	0.131	130	M12, M13, 2.8A
1453	0	13.4	1200	54	2700	0.000784	240	0.131	130	M14, 2.5A
1454	0	13.6	1200	55	2600	0.00079	240	0.131	130	M15, 2.6A
1455	0	13.8	1200	56	2500	0.000797	240	0.131	130	M16, 3A
1457	0	13.7	1200	48	2400	0.0008	239	0.131	130	M17, 3A
1459	0	13.8	1200	49.5	2300	0.00081	237	0.131	130	M18, 3.3A
1501	0	14	1200	50.2	2200	0.00081	237	0.131	130	M19, M29, 3.2A, 10.4kHz
1503	0	14.18	1200	50.2	2100	0.000813	235	0.131	130	M20, 3.4A, 9.5kHz
1505	0	14.3	1200	50.4	2000	0.000815	234	0.131	130	M21, 3.6A, 9.3kHz
1506	0	14.4	1200	49.7	1900	0.00081	233	0.131	130	M22, 3.47A, 8.8kHz
1507	0	14.5	1200	50	1800	0.0008	232	0.131	130	M23, 3.3A, 8.5kHz
1508	0	14.6	1200	51.6	1700	0.00081	230	0.131	129	M24, 3.4A, 9.5kHz
1510	0	14.5	1200	52	1600	0.00082	229	0.131	129	M25, 3.5A, 8.9kHz
1512	0	14.6	1200	51	1600	0.00077	228	0.13	129	M26, 3.6A
1513	0	14.9	1200	52	1600	0.00072	226	0.129	129.9	M27, 3.9A, getting unstable
1514	0	14.7	1200	52	2000	0.0007	226	0.129	129.9	M28, 3.1A
1515	0	16	1200	54	2000	0.00063	226	0.128	129.9	M29, 3.5A, getting unstable for lower flowrates
1516	0	15.2	1200	51	2000	0.00076	228	0.132	129.9	M30, 3.1A
1518	0	15	1200	51.5	2000	0.00079	229	0.133	129.9	M31, 3A
1520	0	15.1	1200	51.4	2000	0.0008	230	0.134	129.9	M32, 2.9A
1521	0	14.9	1200	51.1	2000	0.000817	231	0.135	129.9	M33, 2.8A
1523	0	14.8	1200	51	2000	0.000827	231	0.136	129.9	M34, 3A
1524	0	15.4	1200	52	2000	0.000687	231	0.131	129.9	M35, 2.6A
1526	0	15.3	1100	51.7	2000	0.000683	232	0.131	130	M36, 2.75
1528	0	15.4	1000	52.2	2000	0.00066	232	0.131	130	M37, 2.9A
1531	0	12.8	1200	45	2000	0.00068	230	0.131	130	goes off, instant reignition
1536										very low anode current looks like spot mode, but goes off
1537	0	18	1200	43	1000	0.000789	229	0.134	129	M38, 0.3A, but looks like plume mode
1546	0	15.4	1200	50.5	3000	0.000614	221	0.131	130	M39,
1549	0	15.5	1200	49.5	2500	0.000588	227	0.131	130	M40, 1A
1555	0	15.7	1200	49.8	2500	0.000559	236	0.131	130	M41, 1A
1600	0	15	1000	49.1	2500	0.00055	238	0.131	130	M42, 1A
1604	0	14.8	1000	48.9	2500	0.00055	237	0.131	130	M43, 1A
1613	0	14.9	1000	48.6	2500	0.00054	237	0.131	130	M44, 1.1A
1643	0	16.7	1000	53.2	2500	0.000448	244	0.133	130	pressure goes down, increasing valve
1646	0	17	1000	53.6	2500	0.000445	245	0.134	130	pressure goes down, increasing valve
1648	0	16.8	1000	52.9	2500	0.00045	246	0.136	130	pressure goes down, increasing valve
1650	0	16.8	1000	52.2	2500	0.00047	246	0.14	130	pressure goes down, increasing valve
1653	0	17	1000	51.9	2500	0.00048	246	0.15	130
1657	0	15.2	1000	49.5	2500	0.000396	245.8	0.15	130	Mode change
1700	0	16.2	1000	52.5	2500	0.000336	242.5	0.131	130
1702	0	14.8	1000	56	2500	0.000464	242	0.2	130	Valve is fully open, pressure still drops.
1711	0	14.9	1000	58	2500	0.000407	240	0.2	130	M45, 2.6A
1718	0									Unstable, goes off
1719	0	0	0	0	0	0.000588	241	0.2-0	129	Valve closing sweep
1723	0	0	0	0	0	2.5e-05	214	0-0.2		Valve opening sweep, pressure rises first, then goes down to ~4.6e-4
1731									130	Tank heater switched off
1745									100	No step in cooldown temperature visible, tank must be empty

## Sheet: Figure 10
Hollow cathode testing data - Figure 10
Hand recorded data. For the automatically recorded data contact the author please.
time	Krypton flow in sccm	U_keeper	I_keeper	U_anode	I_anode	p_chamber	Mount temp	iodine valve current	tank temperature	comment
		in V	in mA	in V	in mA	in mbar	in °C	in mA	in °C
1749	30	400	1200	400	3000					Krypton test
1750	30	14.9	1200	66	3000	0.00083	120	0	95	Instant ignition
1751	30	15.3	1200	51	2500	0.000827	147	0	94	M47, 1.7A
1753	30	13.2	500	51	2500	0.000826	166	0	93
1755	30	16.9	1200	48	2000	0.000827	184	0	92
1756	30	12.2	1200	65	3000	0.00083	198			M48, spot
		11.8	1000	62
		11.5	800	54						Plume?
		10.8	600	47
		10.2	400	51
		9.6	200	52
		7.8	10	48.5
1800	25	13.3	500	51	3000	0.00069	215	0	90	M49, 1A
		9.5		50.2	2900
		9.6		50.5	2800
		9.8		50.3	2700					M50, 0.9A
		12.9		52.7	2600
		15.1		54.3	2500
		15.2		54.1	2400
		15.3		53	2300
					2200					goes off
1808	25	11.2	100	53.3	3000	0.00069	239	0	90	M51, 1.5A
		9.3		48	2900
		9.5		47.7	2800
		10		48.5	2700
1813	30	9.2	100	48.9	3000	0.00082	232	0	90	M52, 1A
		9.8		48.5	2900
		10.2		48.6	2800
		10.4		48.2	2700
1818	20	8.4	100	50.6	3000	0.000554	227	0	90	M53, 1.6A
		8.15		48.1	2900
		8.1		47.4	2800
		8.2		48.2	2700
1820	30	14.7	1200	48.3	2000	0.000818	226			M54, 0.8A
	29	14.2		48.2		0.000792	225			Check also cathode feeding pressure
	28	14		48.4		0.000766	225
	27	13.9		48.5		0.000739	225
	26	13.9		48.8		0.000712	225
	25	13.9		49		0.000685	225
	24	13.9		49.2		0.000659	225
	23	14.1		49.5		0.000631	225
	22	14.3		49.9		0.000605	225
	21	14.4		50.1		0.000578	225
	20	14.7		50.7		0.000551	225
	19	14.9		51.2		0.000525	225
	18	15.5		52.4		0.000498	225
	17	16.1		53.3		0.000472	225
	16	16.7		54		0.000445	225
	15	17.1		55.1		0.000417	225
1833	25	14.2	1000	54.2	2500	0.000687	229
1834	30	11.5	1000	48.2	2500	0.000817	231
1836	30	12	1000	48.4	2500	0.000817	232	0	90	end of test

## Sheet: Figure 11
Hollow cathode testing data - Figure 11
Hand recorded data. For the automatically recorded data contact the author please.
time	Krypton flow in sccm	U_keeper	I_keeper	U_anode	I_anode	p_chamber	Mount temp	iodine valve current	tank temperature	comment
		in V	in mA	in V	in mA	in mbar	in °C	in mA	in °C
1312	0	100	46	0	0	1e-05	104	0	130	valve heated to 130°C, Keeper Short circuit
1315	30	19.2	1200	54	3000	0.0008	105	0	130	Somehow unstable, but ignites easily on krypton, anode cable glows
1320	30	3.3	1000	50.4	2500	0.00075	133	0	130	waiting for the temperature to stabilise
1318	30	15.1	1000	47	2500	0.000758	148	0	130
1325	30	14.9	1000	40.8	2500	0.000766	197	0	130	M0, 0.5A
1330	30	15	1000	40.1	2500	0.00077	207	0	130	M1, ,0.45A, Switch to iodine in 60s start
1332	0	2.2	1200	42	3000	0.00411	214	0.145	130	Iodine only, but restart with iodine, not krypton. Restart worked only on high current and higher flow rate
1335	0	1.73	1000	46.8	2500	0.000391	209	0.14	130	M2, 0.6A
1339	0	0.65	10	56.5	2500	0.000282	205	0.131	130	Flowrate sweep from 0.131 to 0.145 in 600s
1341	0	0.62	10	54	2500	0.000283	206.5	0.132	130	M3, 0.5A
1343										Cathode goes off, keeper short circuit prevents reignition, venting
1358										Keeper works again after getting cold
1400	0	0	0	53	2500	0.00059	138	0.131	126	Restart on iodine
1405	0	0	0	39	2500	0.00185	178	0.131	128.6	Pressure is very bad because TP restarts
1409	0	0	0	38.1	2500	0.0021	193	0.131	130.8	Pumping seems to take effect
1411	0	0	0	42.5	2500	0.00082	195	0.123	131.2	M4, 0.5A, Reducing valve setting
1414	0	0	0	45.5	2500	0.000625	196	0.122	131.3	M5, 0.5A, Seems the most stable setting for the flowrate
1417	0	0	0	53.1	2500	0.00045	197	0.12	131	M7, 0.5A, Pressure rises again, reducing valve
1422	0	0	0	43.5	2500	0.00057	200	0.12	130.7	M8, 0.5A
1426	0	0	0	47	2000	0.00073	201	0.12	130.3	M9, 0.3A
1428	0	0	0	48.5	1500	0.00078	200.4	0.12	130.18	M10, 0.2A
1430					1500					Flow rate sweep, no spot mode found
1431	0	0	0	46.7	3000	0.00061	197	0.121	130.1	Flow rate sweep, no spot mode found
1433					3000-2500					Sweep
1434	0	0	0	44.2	2500	0.000615	199	0.121	130	M11, 0.5A
1443	0	0	0	43.2	2500	0.00072	200.6	0.121	129.95
1547	0	0	0	49.1	2500	0.00048	205.8	0.121 \ 9.63V	130.13
1627	0	0	0	50.1	2500	0.000475	207	0.121	129.9
1750	0	0	0	45.8	2500	0.00083	201.9	0.12	130.1
1755	0	0	0	50.6	2000	0.00068	205	0.12	130	Changed anode current for better stability
1803	0	0	0	53.3						Mode change, goes off
1804	0	400	1200	400	3000					Reignites immidiately
1805	0	13.6	1000	42.6	2500	0.000387	206	0.131	130.1	Short episode of spot mode
1812										Sweep to find spot mode, not succesful
1819	0	0	0	50.1	1500	0.00029	204	0.13	130	Sweep again, looks like spot mode
1822	0	0	0	55	2500	0.00024	194	0.131	130	goes off, reignition with keeper
										tank is empty or pressure sensor is not reliable
1827										Too unstable, switching off
1828	0	24.7	1200	0	0	0.0002	195	0.2	129.9	Keeper only
1829									130	Iodine off, tank off
1850									100	No step in cooldown temperature visible, tank must be empty
1513	0	14.9	1200	52	1600	0.00072	226	0.129	129.9	M27, 3.9A, getting unstable
1514	0	14.7	1200	52	2000	0.0007	226	0.129	129.9	M28, 3.1A
1515	0	16	1200	54	2000	0.00063	226	0.128	129.9	M29, 3.5A, getting unstable for lower flowrates
1516	0	15.2	1200	51	2000	0.00076	228	0.132	129.9	M30, 3.1A
1518	0	15	1200	51.5	2000	0.00079	229	0.133	129.9	M31, 3A
1520	0	15.1	1200	51.4	2000	0.0008	230	0.134	129.9	M32, 2.9A
1521	0	14.9	1200	51.1	2000	0.000817	231	0.135	129.9	M33, 2.8A
1523	0	14.8	1200	51	2000	0.000827	231	0.136	129.9	M34, 3A
1524	0	15.4	1200	52	2000	0.000687	231	0.131	129.9	M35, 2.6A
1526	0	15.3	1100	51.7	2000	0.000683	232	0.131	130	M36, 2.75
1528	0	15.4	1000	52.2	2000	0.00066	232	0.131	130	M37, 2.9A
1531	0	12.8	1200	45	2000	0.00068	230	0.131	130	goes off, instant reignition
1536										very low anode current looks like spot mode, but goes off
1537	0	18	1200	43	1000	0.000789	229	0.134	129	M38, 0.3A, but looks like plume mode
1546	0	15.4	1200	50.5	3000	0.000614	221	0.131	130	M39,
1549	0	15.5	1200	49.5	2500	0.000588	227	0.131	130	M40, 1A
1555	0	15.7	1200	49.8	2500	0.000559	236	0.131	130	M41, 1A
1600	0	15	1000	49.1	2500	0.00055	238	0.131	130	M42, 1A
1604	0	14.8	1000	48.9	2500	0.00055	237	0.131	130	M43, 1A
1613	0	14.9	1000	48.6	2500	0.00054	237	0.131	130	M44, 1.1A
1643	0	16.7	1000	53.2	2500	0.000448	244	0.133	130	pressure goes down, increasing valve
1646	0	17	1000	53.6	2500	0.000445	245	0.134	130	pressure goes down, increasing valve
1648	0	16.8	1000	52.9	2500	0.00045	246	0.136	130	pressure goes down, increasing valve
1650	0	16.8	1000	52.2	2500	0.00047	246	0.14	130	pressure goes down, increasing valve
1653	0	17	1000	51.9	2500	0.00048	246	0.15	130
1657	0	15.2	1000	49.5	2500	0.000396	245.8	0.15	130	Mode change
1700	0	16.2	1000	52.5	2500	0.000336	242.5	0.131	130
1702	0	14.8	1000	56	2500	0.000464	242	0.2	130	Valve is fully open, pressure still drops.
1711	0	14.9	1000	58	2500	0.000407	240	0.2	130	M45, 2.6A
1718	0									Unstable, goes off
1719	0	0	0	0	0	0.000588	241	0.2-0	129	Valve closing sweep
1723	0	0	0	0	0	2.5e-05	214	0-0.2		Valve opening sweep, pressure rises first, then goes down to ~4.6e-4
1731									130	Tank heater switched off
1745									100	No step in cooldown temperature visible, tank must be empty
